# Supplementary material for: Acceptance towards Monkeypox Vaccination: A Systematic Review and Meta-Analysis
Source: MDPI journal article supplement (doi:10.3390/pathogens11111248), 2022-10-28
Supplement: s1 [file s1]

**Table S1.** Search strategies

| Source | PubMed                                                                                                                                                                                                                                                                                                                                                     |
|--------|------------------------------------------------------------------------------------------------------------------------------------------------------------------------------------------------------------------------------------------------------------------------------------------------------------------------------------------------------------|
| Search | Formula                                                                                                                                                                                                                                                                                                                                                    |
| #1     | Monkeypox virus [MH] OR Monkeypox [MH] OR "monkeypox*" [TIAB] OR ("monkey*" [TIAB] AND "pox*" [TIAB]) OR "chimpanzeepox*" [TIAB]                                                                                                                                                                                                                           |
| #2     | Vaccination [MH] OR vaccin* [TIAB] OR immunization* [TIAB] OR immunisation* [TIAB]                                                                                                                                                                                                                                                                         |
| #3     | #1 AND #2                                                                                                                                                                                                                                                                                                                                                  |
| Source | Scopus                                                                                                                                                                                                                                                                                                                                                     |
| Search | Formula                                                                                                                                                                                                                                                                                                                                                    |
| #1     | TITLE-ABS-KEY ("monkeypox*" OR ("monkey*" W/3 "pox*") OR "chimpanzeepox*")                                                                                                                                                                                                                                                                                 |
| #2     | TITLE-ABS-KEY("vaccin*" OR "immunization*" OR "immunisation*")                                                                                                                                                                                                                                                                                             |
| #3     | #1 AND #2                                                                                                                                                                                                                                                                                                                                                  |
| Source | Web of Science                                                                                                                                                                                                                                                                                                                                             |
| Search | Formula                                                                                                                                                                                                                                                                                                                                                    |
| #1     | TI=("monkeypox*" OR ("monkey*" NEAR/3 "pox*") OR "chimpanzeepox*") OR AB=("monkeypox*" OR ("monkey*" NEAR/3 "pox*") OR "chimpanzeepox*") OR AK=("monkeypox*" OR ("monkey*" NEAR/3 "pox*") OR "chimpanzeepox*") OR KP=("monkeypox*" OR ("monkey*" NEAR/3 "pox*") OR "chimpanzeepox*") OR TS=("monkeypox*" OR ("monkey*" NEAR/3 "pox*") OR "chimpanzeepox*") |
| #2     | TI=("vaccin*" OR "immunization*" OR "immunisation*") OR AB=("vaccin*" OR "immunization*" OR "immunisation*") OR AK=("vaccin*" OR "immunization*" OR "immunisation*") OR KP=("vaccin*" OR "immunization*" OR "immunisation*") OR TS=("vaccin*" OR "immunization*" OR "immunisation*")                                                                       |
| #3     | #1 AND #2                                                                                                                                                                                                                                                                                                                                                  |
| Source | Embase                                                                                                                                                                                                                                                                                                                                                     |
| Search | Formula                                                                                                                                                                                                                                                                                                                                                    |
| #1     | 'monkeypox'/exp OR ("monkeypox*" OR ("monkey*" NEAR/3 "pox*") OR "chimpanzeepox*"):ti OR ("monkeypox*" OR ("monkey*" NEAR/3 "pox*") OR "chimpanzeepox*"):ab OR ("monkeypox*" OR ("monkey*" NEAR/3 "pox*") OR "chimpanzeepox*"):kw                                                                                                                          |
| #2     | 'vaccination'/exp OR ('vaccin*' OR 'immunization*' OR 'immunisation*'):ti OR ('vaccin*' OR 'immunization*' OR 'immunisation*'):ab OR ('vaccin*' OR 'immunization*' OR 'immunisation*'):kw                                                                                                                                                                  |
| #3     | #1 AND #2                                                                                                                                                                                                                                                                                                                                                  |
| Source | OVID                                                                                                                                                                                                                                                                                                                                                       |
| Search | Formula                                                                                                                                                                                                                                                                                                                                                    |
| #1     | (monkeypox* OR (monkey* adj3 pox*) OR chimpanzeepox*).ti. OR (monkeypox* OR (monkey* adj3 pox*) OR chimpanzeepox*).ab. OR (monkeypox* OR (monkey* adj3 pox*) OR chimpanzeepox*).kw.                                                                                                                                                                        |
| #2     | (vaccin* OR immunization* OR immunisation*).ti. OR (vaccin* OR immunization* OR immunisation*).ab. OR (vaccin* OR immunization* OR immunisation*).kw.                                                                                                                                                                                                      |
| #3     | #1 AND #2                                                                                                                                                                                                                                                                                                                                                  |



Table S2. Quality assessment of included studies.

| NEWCASTLE - OTTAWA QUALITY ASSESSMENT SCALE FOR CROSS-SECTIONAL STUDIES |                                     |                |                     |                                                   |                                                                                                                                                                       |                                                 |                     |       |                      |
|-------------------------------------------------------------------------|-------------------------------------|----------------|---------------------|---------------------------------------------------|-----------------------------------------------------------------------------------------------------------------------------------------------------------------------|-------------------------------------------------|---------------------|-------|----------------------|
| STUDY                                                                   | SELECTION                           |                |                     | COMPARABILITY                                     |                                                                                                                                                                       | OUTCOME                                         |                     |       |                      |
|                                                                         | Representativeness<br>of the sample | Sample<br>size | Non-<br>respondents | Ascertainment<br>of the exposure<br>(risk factor) | The subjects in<br>different outcome<br>groups are comparable,<br>based on the study<br>design or analysis.<br>Confounding factors<br>are controlled.<br>Maximum : ☆☆ | Assessment<br>of outcome<br><br>Maximum :<br>☆☆ | Statistical<br>test | SCORE | Evidence<br>quality  |
| Ahmed SK<br>et.al [33]                                                  | ☆                                   | ☆              | ☆                   | ☆                                                 | ☆☆                                                                                                                                                                    | ☆                                               | ☆                   | 8     | Low risk<br>of bias  |
| Winter MS<br>et.al[34]                                                  | ☆                                   | ☆              |                     | ☆                                                 | ☆                                                                                                                                                                     | ☆                                               | ☆                   | 6     | High risk<br>of bias |
| Wang H<br>et.al[35]                                                     | ☆                                   | ☆              | ☆                   | ☆                                                 | ☆☆                                                                                                                                                                    | ☆                                               | ☆                   | 8     | Low risk<br>of bias  |
| Gagneux-<br>Brunon A<br>et.al[36]                                       | ☆                                   | ☆              | ☆                   | ☆                                                 | ☆                                                                                                                                                                     | ☆                                               | ☆                   | 7     | Low risk<br>of bias  |
| Salim NA<br>et.al[43]                                                   | ☆                                   | ☆              |                     | ☆                                                 | ☆                                                                                                                                                                     | ☆                                               | ☆                   | 6     | High risk<br>of bias |
| Ricco M<br>et.al[37]                                                    | ☆                                   | ☆              | ☆                   | ☆                                                 | ☆☆                                                                                                                                                                    | ☆                                               | ☆                   | 8     | Low risk<br>of bias  |
| Meo SA<br>et.al[38]                                                     | ☆                                   | ☆              | ☆                   | ☆                                                 | ☆☆                                                                                                                                                                    | ☆                                               | ☆                   | 8     | Low risk<br>of bias  |
| Temsah MH<br>et.al[39]                                                  | ☆                                   | ☆              | ☆                   | ☆                                                 | ☆☆                                                                                                                                                                    | ☆                                               | ☆                   | 8     | Low risk<br>of bias  |
| Paparini S<br>et.al[40]                                                 | ☆                                   | ☆              | ☆                   | ☆                                                 | ☆                                                                                                                                                                     | ☆                                               | ☆                   | 7     | Low risk<br>of bias  |
| Harapan H<br>et.al[41]                                                  | ☆                                   | ☆              | ☆                   | ☆                                                 | ☆                                                                                                                                                                     | ☆                                               | ☆                   | 7     | Low risk<br>of bias  |
| Al-Mustapha<br>AI et.al[42]                                             | ☆                                   | ☆              | ☆                   | ☆                                                 | ☆                                                                                                                                                                     | ☆                                               | ☆                   | 7     | Low risk<br>of bias  |



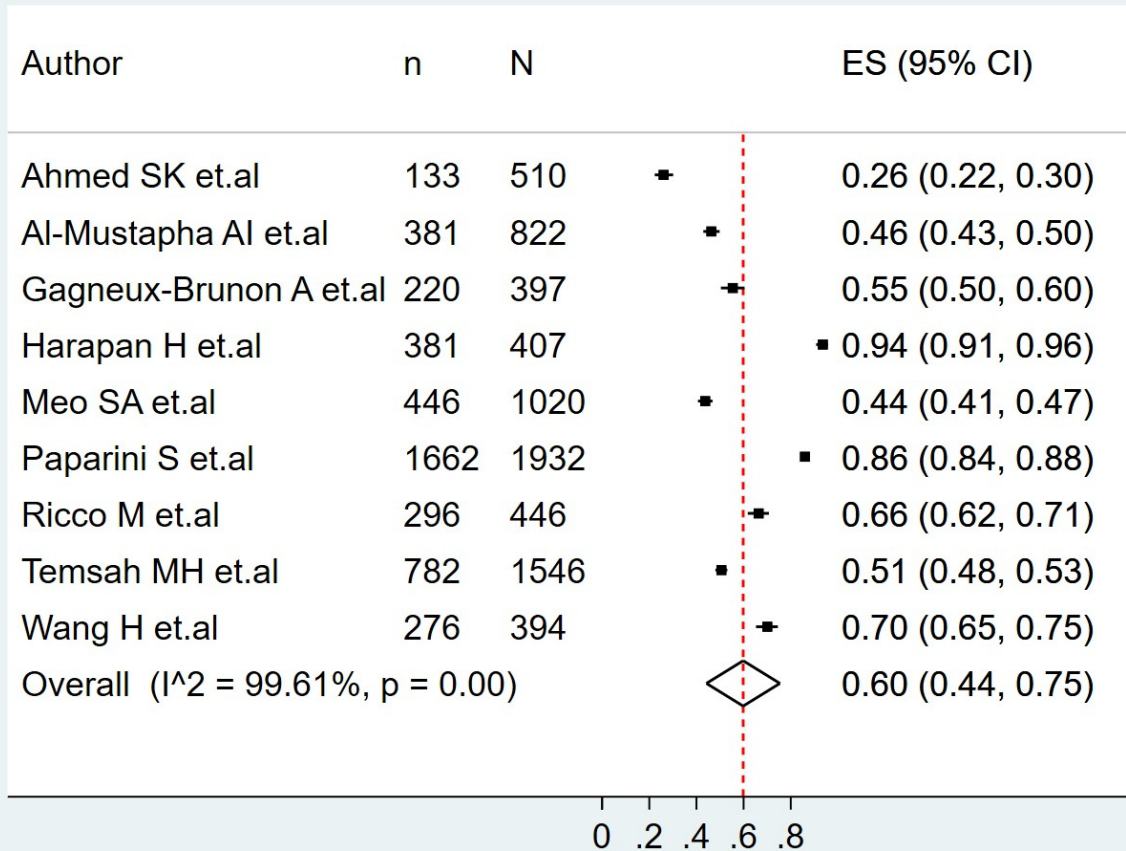

**Figure S1.** Sensitivity analysis of monkeypox vaccine acceptance according to the risk of bias.[33,35–42]
